# Supplementary material
Source: PubMed Central journal article supplement (PMC7879208)
Supplement: mmc1.pdf [file mmc1.pdf]

## SUPPLEMENTAL FIGURES 1-5

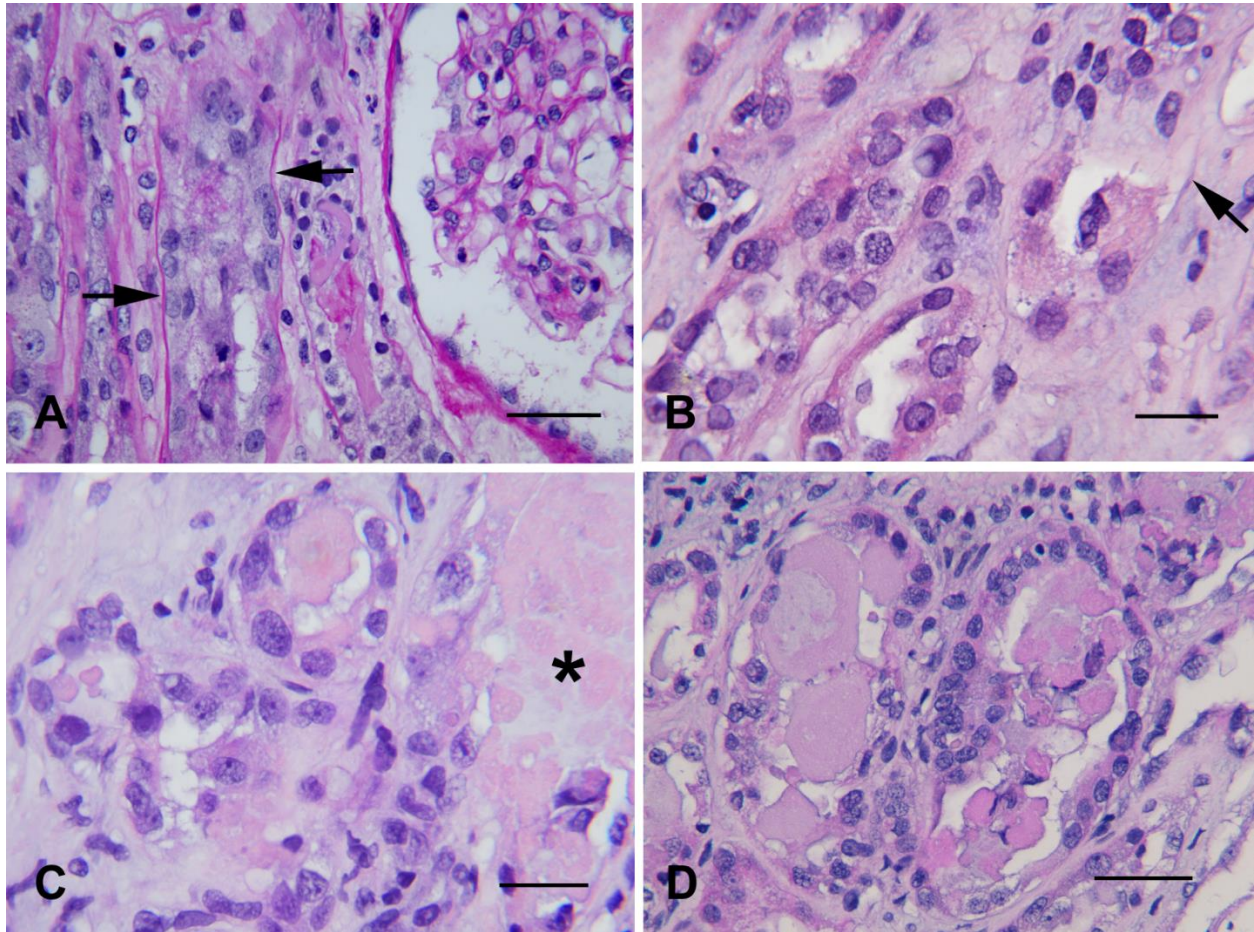

**FIGURE 1: Additional light microscopy images D10Bx**

A: Part of a glomerulus with patent capillaries and mild, segmental increase in mesangial matrix. Arrows mark a tubule with complete loss of tubular epithelium columnar cell polarity and absence of brush border. The basement membranes are within expected limits, indicating an acute process (no evidence of underlying tubular atrophy). PAS stain.

B: Diffuse acute tubular injury. Reactive nuclear enlargement, cytoplasmic swelling and isolated cell necrosis with denuded basement membrane (arrow). H&E stain. C: Severe acute tubular injury with cytoplasmic swelling and coarse vacuolization. Multicellular tubular cell necrosis, with shedding into the lumen (asterisk). H&E stain. D: Two tubules with severe epithelial cell injury and prominent casts, both proteinaceous (left) and cellular (right). H&E stain.

Bars: A,D 50 microns; B,C 25 microns

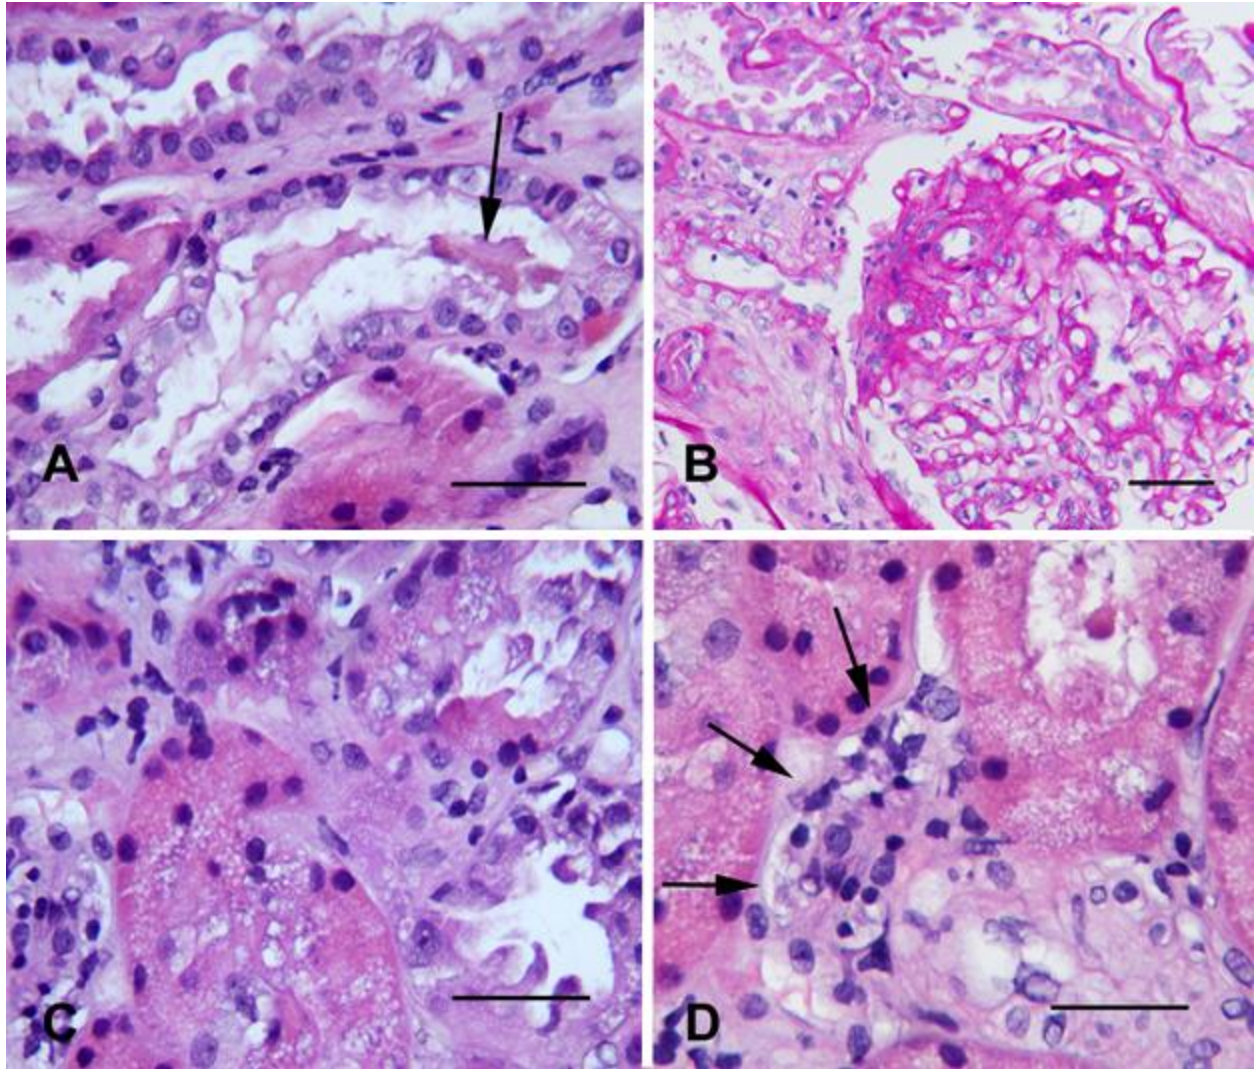

**FIGURE 2: Additional light microscopy images D84Bx**

A': Severe tubular injury with poorly formed protein cast (arrow). H&E stain. B': Glomerulus with hilar/perihilar segmental sclerosis. PAS stain. C': Diffuse acute tubular injury with marked cytoplasmic vacuolization, blebbing and reactive nuclear changes. H&E stain. D': Tubular injury and abnormal PTC (arrows) with swollen endothelial cells and associated mononuclear infiltrates.

Bars: 50 microns

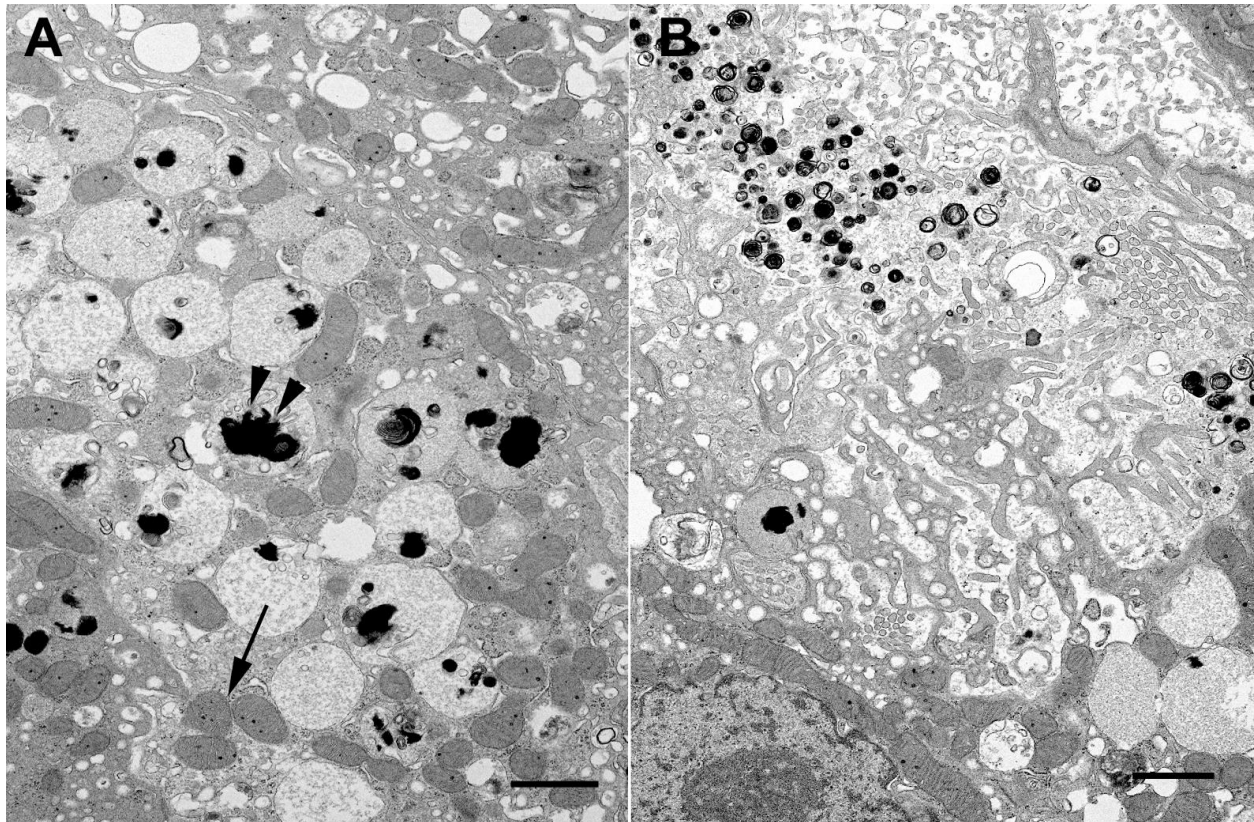

**FIGURE 3: Additional electron microscopy images D84Bx**

A: Tubular epithelial cell with marked mitochondrial condensation and prominent matrix granules (arrow). The remaining mitochondria are markedly swollen, with disappearance of the cristae, and formation of markedly electron dense aggregates, including membrane aggregates/myelin figures (arrowheads).

B: The tubular epithelial cell cytoplasm shows severe membrane disarray, including extensive microvesicular changes and complex interconnected membranous structures. Many of the vesicles and membranous structures merge with electron dense myelin figures (top left).

Bars: 1 micron

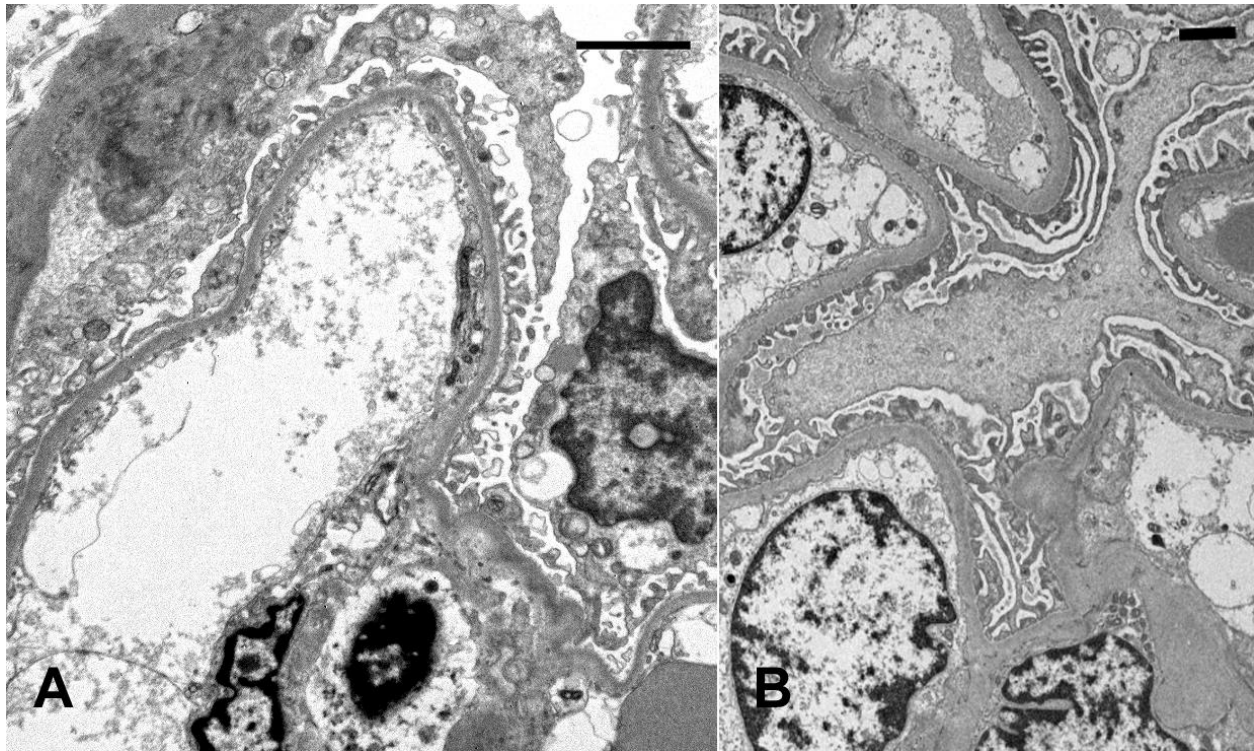

**FIGURE 4: Electron micrographs of glomerular tufts**

**A, D10BX AND B, D84Bx**

Electron micrograph demonstrates preservation of the foot processes of podocytes in most capillary loops in both biopsies. Preservation of the foot processes is consistent with the light microscopic finding of perihilar (secondary) focal segmental glomerulosclerosis in the D84Bx.

Bars: 2 microns

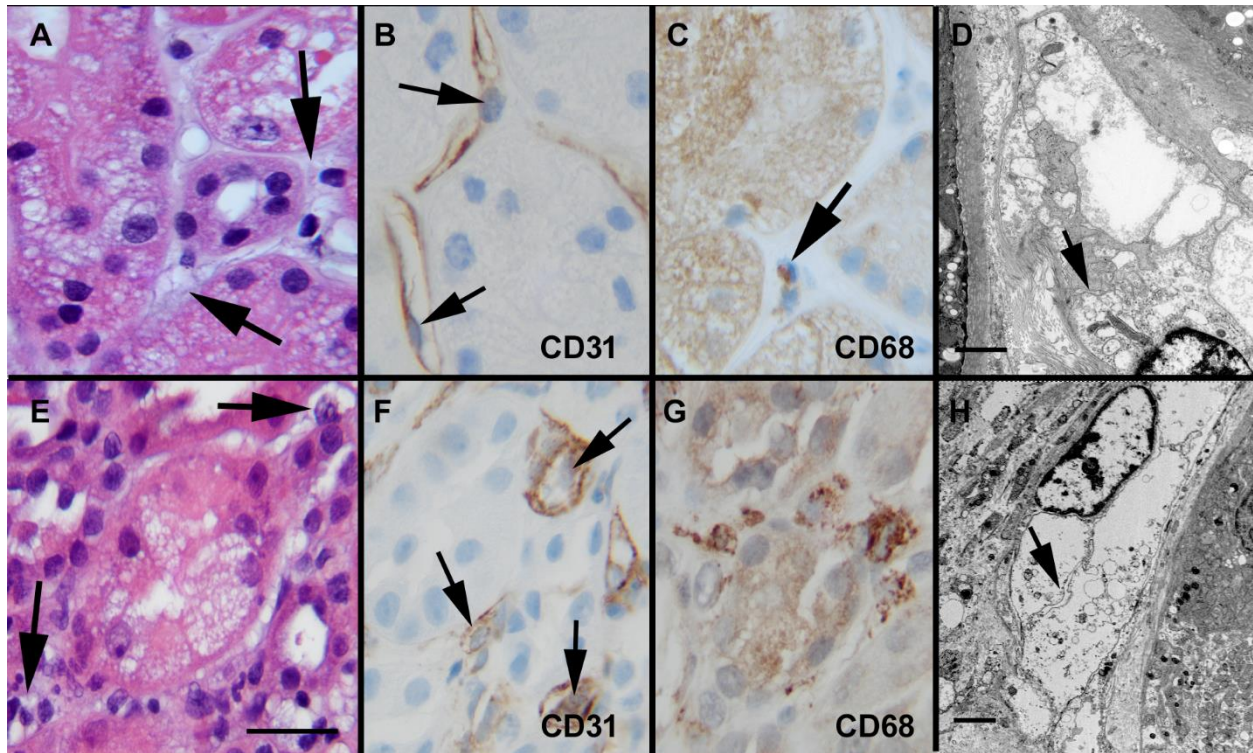

**FIGURE 5: H&E, CD31,CD68 and electron microscopy of ischemic/toxic and sepsis related AKI without OSI**

A-D AKI ischemic/toxic tubular cell injury

A: H&E stain demonstrates marked tubular epithelial cell injury. The PTC and endothelial cells are mostly inconspicuous (arrows). Mononuclear cells are not noted. B: CD31 immunostain shows delicate, well formed, slender PTC with normal to mildly enlarged endothelial cell nuclei (arrows). C: CD68 stain marks a single macrophage in the interstitium (arrow). D: Electron micrograph of PTC shows a swollen endothelial cell with otherwise preserved cellular membranes (arrow); there are no features of OSI seen.

E-H AKI in patient with bacterial sepsis, but no significant hyperinflammation laboratory parameters.

E: H&E stain demonstrates marked tubular cell injury and vacuolization. The PTC have prominent endothelial cells (arrows). There are mild interstitial inflammatory infiltrates. F: CD31 stain highlights the PTC lining with enlarged endothelial cells (arrows). G: CD68 stain highlights macrophage infiltrates in the interstitium. H: Electron micrograph of PTC shows very swollen endothelial cells but the membranes are overall preserved (arrow); there are no features of OSI seen.

Light microscopy: Bar 50 microns

Electron micrographs: Bars 2 microns

## SUPPLEMENTAL REFERENCES

- S1. Hirsch JS, Ng JH, Ross DW, et al. Acute kidney injury in patients hospitalized with COVID-19. *Kidney Int.* 2020.
- S2. Ng JJ, Luo Y, Phua K, Choong A. Acute kidney injury in hospitalized patients with coronavirus disease 2019 (COVID-19): A meta-analysis. *J Infect.* 2020.
- S3. Richardson S, Hirsch JS, Narasimhan M, et al. Presenting Characteristics, Comorbidities, and Outcomes Among 5700 Patients Hospitalized With COVID-19 in the New York City Area. *JAMA.* 2020.
- S4. Cheng Y, Luo R, Wang K, et al. Kidney disease is associated with in-hospital death of patients with COVID-19. *Kidney Int.* 2020;97(5):829-838.
- S5. Rossi GM, Delsante M, Pilato FP, et al. Kidney biopsy findings in a critically ill COVID-19 patient with dialysis-dependent acute kidney injury: a case against "SARS-CoV-2 nephropathy". *Kidney Int Rep.* 2020.
- S6. Puelles VG, Lutgehetmann M, Lindenmeyer MT, et al. Multiorgan and Renal Tropism of SARS-CoV-2. *N Engl J Med.* 2020.
- S7. Wichmann D, Sperhake JP, Lutgehetmann M, et al. Autopsy Findings and Venous Thromboembolism in Patients With COVID-19: A Prospective Cohort Study. *Ann Intern Med.* 2020;173(4):268-277.
- S8. Varga Z, Flammer AJ, Steiger P, et al. Endothelial cell infection and endotheliitis in COVID-19. *Lancet.* 2020;395(10234):1417-1418.
- S9. Miller SE, Brealey JK. Visualization of putative coronavirus in kidney. *Kidney Int.* 2020;98(1):231-232.
- S10. Roufousse C, Curtis E, Moran L, et al. Electron microscopic investigations in COVID-19: not all crowns are coronas. *Kidney Int.* 2020;98(2):505-506.
- S11. Ihara Y, Yasuoka C, Kageyama K, Wada Y, Kondo T. Tyrosine phosphorylation of clathrin heavy chain under oxidative stress. *Biochem Biophys Res Commun.* 2002;297(2):353-360.
- S12. Ackermann M, Verleden SE, Kuehnel M, et al. Pulmonary Vascular Endothelialitis, Thrombosis, and Angiogenesis in Covid-19. *N Engl J Med.* 2020;383(2):120-128.
- S13. Al Nemer A. Histopathologic and Autopsy Findings in Patients Diagnosed With Coronavirus Disease 2019 (COVID 19): What we know So Far Based on Correlation With Clinical, Morphologic and Pathobiological Aspects. *Adv Anat Pathol.* 2020.
- S14. Menges S, Minakaki G, Schaefer PM, et al. Alpha-synuclein prevents the formation of spherical mitochondria and apoptosis under oxidative stress. *Sci Rep.* 2017;7:42942.
- S15. Wilson C, Gonzalez-Billault C. Regulation of cytoskeletal dynamics by redox signaling and oxidative stress: implications for neuronal development and trafficking. *Front Cell Neurosci.* 2015;9:381.

- S16. Hamming I, Timens W, Bulthuis ML, Lely AT, Navis G, van Goor H. Tissue distribution of ACE2 protein, the functional receptor for SARS coronavirus. A first step in understanding SARS pathogenesis. *J Pathol.* 2004;203(2):631-637.
- S17. Noris M, Benigni A, Remuzzi G. The case of complement activation in COVID-19 multiorgan impact. *Kidney Int.* 2020;98(2):314-322.
- S18. Pelayo J, Lo KB, Bhargav R, et al. Clinical Characteristics and Outcomes of Community- and Hospital-Acquired Acute Kidney Injury with COVID-19 in a US Inner City Hospital System. *Cardiorenal Med.* 2020:1-9.
- S19. Tang D, Comish P, Kang R. The hallmarks of COVID-19 disease. *PLoS Pathog.* 2020;16(5):e1008536.
- S20. Tina Schaller M, Klaus Hirschebühl M, Katrin Burkhardt M, et al. Postmortem Examination of Patients With COVID-19. *JAMA.* 2020.
- S21. Zhang YM, Zhang H. Genetic Roadmap for Kidney Involvement of Severe Acute Respiratory Syndrome Coronavirus 2 (SARS-CoV-2) Infection. *Clin J Am Soc Nephrol.* 2020.
- S22. Lerolle N, Nochy D, Guerot E, et al. Histopathology of septic shock induced acute kidney injury: apoptosis and leukocytic infiltration. *Intensive Care Med.* 2010;36(3):471-478.
- S23. Kara A GS, Sengul E, Gelen V, Ozkanlar S. Oxidative Stress and Autophagy. In: Ahmad R, ed. *Free Radicals and Diseases.* Intech; 2016.
- S24. Papadimitriou JC, Drachenberg CB, Shin ML, Trump BF. Ultrastructural studies of complement mediated cell death: a biological reaction model to plasma membrane injury. *Virchows Arch.* 1994;424(6):677-685.
- S25. Basile DP. The endothelial cell in ischemic acute kidney injury: implications for acute and chronic function *Kidney Int* 2007;72;151–156
- S26. Olsen TS, Hansen HE, Olsen HS. Tubular ultrastructure in acute renal failure: alterations of cellular surfaces (brush-border and basolateral infoldings). *Virchows Arch A Pathol Anat Histopathol.* 1985;406(1):91-104.
- S27. Olsen TS, Olsen HS, Hansen HE. Tubular ultrastructure in acute renal failure in man: epithelial necrosis and regeneration. *Virchows Arch A Pathol Anat Histopathol.* 1985;406(1):75-89.
- S28. Diao B, Wang C, Wang R, et al. Human Kidney is a Target for Novel Severe Acute Respiratory Syndrome Coronavirus 2 (SARS-CoV-2) Infection. *medRxiv.* 2020:2020.2003.2004.20031120.
- S29. Zhang D GR, Lei L, Liu H, Wang Y, Wang Y, Qian H, Dai T, Zhang T, Lai Y, Wang J, Liu Z, Chen T, He A, O'Dwyer M, Hu J. COVID-19 infection induces readily detectable morphological and inflammation-related phenotypic changes in peripheral blood monocytes, the severity of which correlate with patient outcome. *medRxiv.* 2020.
- S30. Merad M, Martin JC. Pathological inflammation in patients with COVID-19: a key role for monocytes and macrophages. *Nat Rev Immunol.* 2020;20(6):355-362.

- S31. Edeas M, Saleh J, Peyssonnaux C. Iron: Innocent bystander or vicious culprit in COVID-19 pathogenesis? *Int J Infect Dis.* 2020;97:303-305.
- S32. Kernan KF, Carcillo JA. Hyperferritinemia and inflammation. *Int Immunol.* 2017;29(9):401-409.
- S33. Ruscitti P, Berardicurti O, Di Benedetto P, et al. Severe COVID-19, Another Piece in the Puzzle of the Hyperferritinemic Syndrome. An Immunomodulatory Perspective to Alleviate the Storm. *Front Immunol.* 2020;11:1130.
- S34. Cavezzi A, Troiani E, Corrao S. COVID-19: hemoglobin, iron, and hypoxia beyond inflammation. A narrative review. *Clin Pract.* 2020;10(2):1271.
- S35. Ehsani S. Distant sequence similarity between hepcidin and the novel coronavirus spike glycoprotein: a potential hint at the possibility of local iron dysregulation in COVID-19. [arXiv:2003.12191 \[q-bio.BM\]](https://arxiv.org/abs/2003.12191)
- S36. Cornelissen A, Guo L, Sakamoto A, Virmani R, Finn AV. New insights into the role of iron in inflammation and atherosclerosis. *EBioMedicine.* 2019;47:598-606.
- S37. Rosário C, Zandman-Goddard G, Meyron-Holtz EG, D'Cruz DP, and Shoenfeld Y. The hyperferritinemic syndrome: macrophage activation syndrome, Still's disease, septic shock and catastrophic antiphospholipid syndrome. *BMC Medicine* 2013;11:185.
- S38. Gomez H, Ince C, De Backer D, et al. A unified theory of sepsis-induced acute kidney injury: inflammation, microcirculatory dysfunction, bioenergetics and tubular cell adaptation injury. *Shock* 2014;41(1):3-11.
- S39. Cole NB, Daniels MP, Levine RL, Kim G. Oxidative stress causes reversible changes in mitochondrial permeability and structure. *Exp Gerontol.* 2010;45(7-8):596-602.
- S40. Ott M, Gogvadze V, Orrenius S, Zhivotovsky B. Mitochondria, oxidative stress and cell death. *Apoptosis.* 2007;12(5):913-922.
- S41. Miguet-Alfonsi C, Prunet C, Monier S, et al. Analysis of oxidative processes and of myelin figures formation before and after the loss of mitochondrial transmembrane potential during 7beta-hydroxycholesterol and 7-ketocholesterol-induced apoptosis: comparison with various pro-apoptotic chemicals. *Biochem Pharmacol.* 2002;64(3):527-541.
- S42. Saleh J, Peyssonnaux C, Singh KK, Edeas M. Mitochondria and microbiota dysfunction in COVID-19 pathogenesis. *Mitochondrion.* 2020;54:1-7.
- S43. Sun J, Zhang J, Tian J, et al. Mitochondria in Sepsis-Induced AKI. *J Am Soc Nephrol.* 2019;30(7):1151-1161.
- S44. Malorni W, Testa U, Rainaldi G, Tritarelli E, Peschle C. Oxidative stress leads to a rapid alteration of transferrin receptor intravesicular trafficking. *Exp Cell Res.* 1998;241(1):102-116.
- S45. Stoorvogel W, Oorschot V, Geuze HJ. A novel class of clathrin-coated vesicles budding from endosomes. *J Cell Biol.* 1996;132(1-2):21-33.



S46. Drachenberg CB, Papadimitriou JC. Endothelial injury in renal antibody-mediated allograft rejection: a schematic view based on pathogenesis. *Transplantation*. 2013;95(9):1073-1083.
